# Supplementary material for: Genome-Wide Identification, Evolutionary Analysis, and Expression Patterns of Cathepsin Superfamily in Black Rockfish (Sebastes schlegelii) following Aeromonas salmonicida Infection
Source: MDPI journal article supplement (doi:10.3390/md20080504), 2022-08-03
Supplement: s1 [file s1]

**Supplementary Table. S1. Abbreviations of gene names used in synteny analysis.**

| <b>Gene abbreviation</b> | <b>Full name</b>                                      |
|--------------------------|-------------------------------------------------------|
| pltp                     | Phospholipid transfer protein                         |
| CTSAa                    | Cathepsine Aa                                         |
| ube2c                    | Ubiquitin-conjugating enzyme E2 C                     |
| pcif1                    | phosphorylated CTD interacting factor 1               |
| tfap2c                   | Transcription factor AP-2 gamma                       |
| eya2                     | Eyes absent homolog 2                                 |
| ncoa5                    | Nuclear receptor coactivator 5                        |
| snrpc                    | U1 small nuclear ribonucleoprotein C                  |
| ripor3                   | RIPOR family member 3                                 |
| usp47                    | Ubiquitin carboxyl-terminal hydrolase 47              |
| gli1                     | Zinc finger protein GLI1                              |
| CTSAb                    | Cathepsine Ab                                         |
| mmp24                    | Matrix metalloproteinase-24                           |
| tfap2c                   | Transcription factor AP-2 gamma                       |
| fancm                    | Fanconi anemia group M protein                        |
| smyd2a                   | N-lysine methyltransferase SMYD2-A                    |
| CTSBa                    | Cathepsine Ba                                         |
| gcfc2                    | GC-rich sequence DNA-binding factor 2                 |
| tfb2m                    | transcription factor B2, mitochondrial                |
| kctd3                    | potassium channel tetramerization domain containing 3 |
| esrrg                    | estrogen related receptor gamma                       |
| gata4                    | GATA binding protein 4                                |
| fdft1                    | farnesyl-diphosphate farnesyltransferase 1            |
| CTSBb                    | Cathepsine Bb                                         |
| aida                     | axin interactor, dorsalization associated             |
| mia3                     | MIA SH3 domain ER export factor 3                     |
| dusp10                   | dual specificity phosphatase 10                       |
| CTSC                     | Cathepsine C                                          |
| nox4                     | NADPH oxidase 4                                       |
| naalad2                  | N-acetylated alpha-linked acidic dipeptidase 2        |
| sgpp2                    | sphingosine-1-phosphate phosphatase 2                 |
| farsb                    | phenylalanyl-tRNA synthetase subunit beta             |
| wdfy1                    | WD repeat and FYVE domain containing 1                |
| serpine2                 | serpin family E member 2                              |
| slc12a3                  | solute carrier family 12 member 3                     |
| CTSDa                    | Cathepsine Da                                         |
| il17c                    | interleukin 17C                                       |

|          |                                                            |
|----------|------------------------------------------------------------|
| rassf9   | Ras association domain-containing protein 9                |
| slc24a1  | Sodium/potassium/calcium exchanger 1                       |
| hacd3    | Very-long-chain (3R)-3-hydroxyacyl-CoA dehydratase 3       |
| kmt5b    | Histone-lysine N-methyltransferase KMT5B                   |
| sphkap   | SPHK1 interactor, AKAP domain containing                   |
| nlrc5    | NLR family CARD domain containing 5                        |
| slc6a15  | solute carrier family 6 member 15                          |
| CTSDb    | Cathepsine Db                                              |
| mrpl18   | mitochondrial ribosomal protein L18                        |
| trpt1    | tRNA phosphotransferase 1                                  |
| hnrnph1  | heterogeneous nuclear ribonucleoprotein H1                 |
| rufy1    | RUN and FYVE domain containing 1                           |
| spata4   | spermatogenesis associated 4                               |
| pdgfc    | platelet derived growth factor C                           |
| tomm5    | translocase of outer mitochondrial membrane 5              |
| CTSF     | Cathepsine F                                               |
| kti12    | KTI12 chromatin associated homolog                         |
| blm      | BLM RecQ like helicase                                     |
| CTSHa    | Cathepsine Ha                                              |
| ankrd34c | ankyrin repeat domain 34C                                  |
| idh2     | Isocitrate dehydrogenase [NAD] subunit 2                   |
| pex11a   | peroxisomal biogenesis factor 11 alpha                     |
| fam174b  | family with sequence similarity 174 member B               |
| nr2f2    | nuclear receptor subfamily 2 group F member 2              |
| slco3a1  | solute carrier organic anion transporter family member 3A1 |
| nudt21   | nudix hydrolase 21                                         |
| cmc2     | C-X9-C motif containing 2                                  |
| CTSHb    | Cathepsine Hb                                              |
| idh2     | Isocitrate dehydrogenase [NAD] subunit 2                   |
| rrnad1   | ribosomal RNA adenine dimethylase domain containing 1      |
| isg20l2  | interferon stimulated exonuclease gene 20 like 2           |
| bcan     | brevican                                                   |
| hapln2   | hyaluronan and proteoglycan link protein 2                 |
| scnm1    | sodium channel modifier 1                                  |
| tmod4    | tropomodulin 4                                             |
| hormad1  | HORMA domain containing 1                                  |
| CTSK     | Cathepsine K                                               |
| mccc2    | methylcrotonyl-CoA carboxylase subunit 2                   |
| dapk1    | death associated protein kinase 1                          |
| CTSLa    | Cathepsine La                                              |
| kank1    | KN motif and ankyrin repeat domains 1                      |
| dmrt1    | doublesex and mab-3 related transcription factor 1         |
| grsf1    | G-rich RNA sequence binding factor 1                       |

|         |                                                              |
|---------|--------------------------------------------------------------|
| smn1    | survival of motor neuron 1, telomeric                        |
| wdr54   | WDR54 - WD repeat domain 54                                  |
| pacrg   | parkin coregulated                                           |
| qkia    | Protein quaking-A                                            |
| CTSLb   | Cathepsine Lb                                                |
| ythdf2  | YTH N6-methyladenosine RNA binding protein 2                 |
| asap3   | ArfGAP with SH3 domain, ankyrin repeat and PH domain 3       |
| cnksr1  | connector enhancer of kinase suppressor of Ras 1             |
| grhl3   | grainyhead like transcription factor 3                       |
| nipal3  | NIPA like domain containing 3                                |
| elovl6  | ELOVL fatty acid elongase 6                                  |
| spata4  | spermatogenesis associated 4                                 |
| CTSO    | Cathepsine O                                                 |
| aga     | aspartylglucosaminidase                                      |
| nei3    | nei like DNA glycosylase 3                                   |
| sil1    | SIL1 nucleotide exchange factor                              |
| csnk1a1 | casein kinase 1 alpha 1                                      |
| fbxo38  | F-box protein 38                                             |
| glmp    | glycosylated lysosomal membrane protein                      |
| msto1   | misato mitochondrial distribution and morphology regulator 1 |
| rnf5    | ring finger protein 5                                        |
| nrm     | nurim                                                        |
| mterf1  | mitochondrial transcription termination factor 1             |
| dus3l   | dihydrouridine synthase 3 like                               |
| CTSSa   | Cathepsine Sa                                                |
| tert    | telomerase reverse transcriptase                             |
| bcan    | brevican                                                     |
| hapln2  | hyaluronan and proteoglycan link protein 2                   |
| rhbg    | Rh family B glycoprotein                                     |
| mef2d   | myocyte enhancer factor 2D                                   |
| tmod4   | tropomodulin 4                                               |
| hormad1 | HORMA domain containing 1                                    |
| CTSSb   | Cathepsine Sb                                                |
| ergic3  | ERGIC and golgi 3                                            |
| ahcy    | adenosylhomocysteinase                                       |
| gnas    | GNAS complex locus                                           |
| rab22a  | RAB22A, member RAS oncogene family                           |
| nelfcd  | negative elongation factor complex member C/D                |
| stx16   | syntaxin 16                                                  |
| Dlg1    | discs large MAGUK scaffold protein 1                         |
| cth     | cystathionine gamma-lyase                                    |
| CTSZb   | Cathepsine Zb                                                |
| Cachd1  | cache domain containing 1                                    |

|        |                                                    |
|--------|----------------------------------------------------|
| Eif6   | eukaryotic translation initiation factor 6         |
| Stat2  | signal transducer and activator of transcription 2 |
| Npepl1 | aminopeptidase like 1                              |

**Supplementary Table. S2. Abbreviations and gene ID of gene names  
used in phylogenetic tree Fig. 3**

|                      |                |
|----------------------|----------------|
| CTSA_Atlantic_Salmon | NP_001133654.1 |
| CTSC_Atlantic_Salmon | XP_014018939.1 |
| CTSD_Atlantic_Salmon | XP_014032104.1 |
| CTSF_Atlantic_Salmon | XP_014068431.1 |
| CTSH_Atlantic_Salmon | XP_013980319.1 |
| CTSB_Atlantic_Salmon | XP_014060893.1 |
| CTSO_Atlantic_Salmon | NP_001134063.1 |
| CTSW_Atlantic_Salmon | NP_001133678.1 |
| CTSZ_Atlantic_Salmon | XP_014022687.1 |
| CTSA_Catfish         | XP_017334981.1 |
| CTSC_Catfish         | XP_017346971.1 |
| CTSD_Catfish         | NP_001244039.1 |
| CTSW_Catfish         | XP_017329569.1 |
| CTSH_Catfish         | NP_001187181.1 |
| CTSK_Catfish         | NP_001187379.1 |
| CTSL_Catfish         | NP_001187182.1 |
| CTSO_Catfish         | XP_017330673.1 |
| CTSS_Catfish         | NP_001187179.1 |
| CTSZ_Catfish         | XP_017337363.1 |
| CTSA_Chicken         | NP_001026662.2 |
| CTSB_Chicken         | NP_990702.3    |
| CTSC_Chicken         | NP_001308483.1 |
| CTSD_Chicken         | NP_990508.1    |
| CTSE_Chicken         | XP_015154556.1 |
| CTSH_Chicken         | NP_001305336.2 |
| CTSK_Chicken         | NP_990302.3    |
| CTSG_Chicken         | XP_423728.3    |
| CTSO_Chicken         | NP_001026300.1 |
| CTSS_Chicken         | NP_001026516.1 |
| CTSV_Chicken         | NP_001161481.1 |
| CTSZ_Chicken         | XP_417483.3    |
| CTSA_Fugu            | XP_003976913.1 |
| CTSB_Fugu            | XP_003971767.2 |
| CTSC_Fugu            | XP_011606588.1 |
| CTSD_Fugu            | NP_001072052.1 |
| CTSL_Fugu            | XP_003970181.1 |
| CTSH_Fugu            | XP_003967090.2 |
| CTSK_Fugu            | XP_003965855.1 |
| CTSL_Fugu            | XP_003975123.1 |

|                    |                |
|--------------------|----------------|
| CTSL-like_Fugu     | XP_029688789.1 |
| CTSO_Fugu          | XP_011609247.2 |
| CTSS_Fugu          | XP_003965856.2 |
| CTSZ_Fugu          | XP_003973526.1 |
| CTSA_Mouse         | NP_001033581.1 |
| CTSB_Mouse         | NP_031824.1    |
| CTSC_Mouse         | NP_001298719.1 |
| CTSD_Mouse         | NP_034113.1    |
| CTSE_Mouse         | NP_031825.2    |
| CTSF_Mouse         | NP_063914.1    |
| CTSG_Mouse         | NP_031826.1    |
| CTSH_Mouse         | NP_001299578.1 |
| CTSJ_Mouse         | NP_001343220.1 |
| CTSK_Mouse         | NP_031828.2    |
| CTSL_Mouse         | NP_034114.1    |
| CTSM_Mouse         | NP_001347650.1 |
| CTSO_Mouse         | NP_808330.1    |
| CTSQ_Mouse         | NP_083912.2    |
| CTSR_Mouse         | NP_064680.1    |
| CTSS_Mouse         | NP_001254624.2 |
| CTSW_Mouse         | NP_034115.2    |
| CTSZ_Mouse         | NP_071720.1    |
| CTSA_Human         | NP_000299.3    |
| CTSB_Human         | NP_001304166.1 |
| CTSC_Human         | NP_001107645.1 |
| CTSD_Human         | NP_001900.1    |
| CTSE_Human         | NP_001304260.1 |
| CTSF_Human         | NP_003784.2    |
| CTSG_Human         | NP_001902.1    |
| CTSH_Human         | NP_001306066.1 |
| CTSK_Human         | NP_000387.1    |
| CTSL_Human         | NP_001244900.1 |
| CTSO_Human         | NP_001325.1    |
| CTSS_Human         | NP_001186668.1 |
| CTSV_Human         | NP_001188504.1 |
| CTSW_Human         | NP_001326.3    |
| CTSZ_Human         | NP_001327.2    |
| CTSA_Flounder      | XP_019969053.1 |
| CTSC_Flounder      | XP_019950816.1 |
| CTSF_Flounder      | XP_019938592.1 |
| CTSK_Flounder      | XP_019949027.1 |
| CTSL_like_Flounder | XP_019965003.1 |
| CTSL_Flounder      | XP_019964915.1 |

|                       |                |
|-----------------------|----------------|
| CTSO_Flounder         | XP_019936419.1 |
| CTSZ_Flounder         | XP_019942181.1 |
| CTSS_like_Flounder    | XP_019948991.1 |
| CTSA_Medaka           | NP_001287800.1 |
| CTSC_Medaka           | XP_004075795.1 |
| CTSD_Medaka           | XP_023807545.1 |
| CTSF_Medaka           | XP_004073613.1 |
| CTSH_Medaka           | XP_023811589.1 |
| CTSK_Medaka           | XP_004078392.1 |
| CTSB_Medaka           | XP_020555295.2 |
| CTSL_Medaka           | XP_004082231.1 |
| CTSO_Medaka           | XP_004086527.1 |
| CTSS_Medaka           | NP_001098157.1 |
| CTSZ_Medaka           | XP_023810942.1 |
| CTSA_Tilapia          | NP_001298249.1 |
| CTSC_Tilapia          | XP_003441633.1 |
| CTSD_Tilapia          | XP_003452633.1 |
| CTSF_Tilapia          | XP_003451852.1 |
| CTSAH_Tilapia         | XP_003440460.1 |
| CTSK_Tilapia          | XP_019220230.1 |
| CTSB_Tilapia          | XP_003454569.1 |
| CTSO_Tilapia          | XP_003443496.2 |
| CTSZ_Tilapia          | XP_003441550.1 |
| CTSK_Rainbow_Trout    | XP_036801718.1 |
| CTSBb_Rainbow_Trout   | NP_001117776.1 |
| CTSH_Rainbow_Trout    | XP_021427100.1 |
| CTSD_Rainbow_Trout    | NP_001118183.1 |
| CTSA_Rainbow_Trout    | XP_021466360.1 |
| CTSC_Rainbow_Trout    | NP_001117966.1 |
| CTSO_Rainbow_Trout    | XP_021417079.2 |
| CTSZ_Rainbow_Trout    | XP_021465814.2 |
| CTSA_River_Trout      | XP_029548870.1 |
| CTSL_like_River_Trout | XP_029586573.1 |
| CTSH_River_Trout      | XP_029613466.1 |
| CTSA_Tongue_Sole      | XP_008319457.1 |
| CTSC_Tongue_Sole      | XP_008308025.1 |
| CTSD_Tongue_Sole      | NP_001281160.1 |
| CTSF_Tongue_Sole      | XP_008325732.1 |
| CTSH_Tongue_Sole      | XP_008309210.1 |
| CTSK_Tongue_Sole      | XP_008322033.1 |
| CTSL_Tongue_Sole      | XP_024917672.1 |
| CTSB_Tongue_Sole      | XP_008311144.1 |
| CTSO_Tongue_Sole      | XP_024918766.1 |

|                     |                |
|---------------------|----------------|
| CTSZ_Tongue_Sole    | XP_008318331.1 |
| CTSS_Tongue_Sole    | XP_008322035.1 |
| CTSA_Turbot         | XP_035486752.1 |
| CTSC_Turbot         | XP_035479088.1 |
| CTSF_Turbot         | XP_035505110.1 |
| CTSH_Turbot         | XP_035497764.1 |
| CTSD_Turbot         | NP_001072052.1 |
| CTSK_Turbot         | XP_003965855.1 |
| CTSL-like_Turbot    | XP_035476549.1 |
| CTSL_Turbot         | XP_035467019.1 |
| CTSO_Turbot         | XP_035506512.1 |
| CTSS_Turbot         | XP_035463881.1 |
| CTSZ_Turbot         | XP_035488786.1 |
| CTSK_Turbot         | XP_035464553.1 |
| CTSA_Zebrafish      | NP_956844.1    |
| CTSC_Zebrafish      | NP_999887.1    |
| CTSD_Zebrafish      | NP_571785.2    |
| CTSF_Zebrafish      | NP_001071036.1 |
| CTSH_Zebrafish      | NP_997853.1    |
| CTSK_Zebrafish      | NP_001017778.1 |
| CTSLb_Zebrafish     | NP_571273.2    |
| CTSL-like_Zebrafish | XP_021335957.1 |
| CTSBa_Zebrafish     | NP_998501.1    |
| CTSO_Zebrafish      | XP_021336916.1 |
| CTSZ_Zebrafish      | NP_001006043.1 |
| CTSS_Zebrafish      | NP_001019580.2 |



**Supplementary Table. S3. Abbreviations and gene ID of gene names  
used in PPI**

|                  |                     |
|------------------|---------------------|
| neu1             | ENSDARP00000015727  |
| galns            | ENSDARP000000124843 |
| ctsd             | ENSDARP000000074872 |
| ctsz             | ENSDARP000000063250 |
| ctsba            | ENSDARP000000071885 |
| glb1             | ENSDARP000000106759 |
| TPP2             | ENSDARP000000126605 |
| agtrap           | ENSDARP000000104107 |
| NAPSA            | ENSDARP000000012342 |
| nots             | ENSDARP000000069198 |
| hspa5            | ENSDARP000000017456 |
| kif1a            | ENSDARP000000129632 |
| elna             | ENSDARP000000093092 |
| pebp1            | ENSDARP000000112865 |
| cd74a            | ENSDARP000000002547 |
| TOLL8            | LOC100332583        |
| mhc2b            | ENSDARP000000072268 |
| mhc2bl           | ENSDARP000000088705 |
| zgc:153067       | ENSDARP000000090055 |
| si:zfos-2070c2.3 | ENSDARP000000097822 |
| mhc2dab          | ENSDARP000000100252 |
| mhc2dcb          | ENSDARP000000110668 |
| mhc2d8.46a       | LOC571282           |
| bida             | ENSDARP000000126479 |
| zgc:65811        | ENSDARP000000066141 |
| ctsba            | ENSDARP000000071885 |
| cst3             | ENSDARP000000113296 |
| mhc2a            | LOC791723           |
| zgc:153129       | ENSDARP000000067593 |
| zgc:66382        | ENSDARP000000124424 |
| psap             | ENSDARP000000045068 |
| zgc:162351       | ENSDARP000000091917 |
| bloc1s6          | ENSDARP000000122569 |
| chchd7           | ENSDARP000000124392 |
| ifi30            | ENSDARP000000073325 |
| prcp             | ENSDARP000000077802 |
| ctssb.1          | ENSDARP000000099159 |
| scpep1           | ENSDARP000000058604 |
| letm1            | ENSDARP000000074011 |

|                    |                     |
|--------------------|---------------------|
| obs1a              | ENSDARP000000122095 |
| obs1a              | ENSDARP000000122095 |
| zfyve28            | ENSDARP000000116818 |
| epx                | ENSDARP000000010533 |
| TPO                | ENSDARP000000046463 |
| lamp1b             | LOC563328           |
| igf2r              | ENSDARP000000061100 |
| Lamp1              | ENSDARP000000070764 |
| lamp2              | ENSDARP000000105565 |
| esr1               | ENSDARP000000024987 |
| cpvl               | ENSDARP000000073441 |
| sftpba             | ENSDARP000000122408 |
| cdh22              | ENSDARP000000104331 |
| ZXDC               | ENSDARP000000126156 |
| cobl               | ENSDARP000000108248 |
| IQSEC1             | ENSDARP000000043090 |
| il12rb2            | ENSDARP000000005204 |
| pdia4              | ENSDARP000000018458 |
| mmp13b             | ENSDARP000000036104 |
| mmp20a             | ENSDARP000000106475 |
| ugt1b5             | ENSDARP000000112070 |
| wfikkn1            | ENSDARP000000098282 |
| ccr12.2            | ENSDARP000000066871 |
| fabp6              | ENSDARP000000065447 |
| birc5a             | ENSDARP000000101794 |
| birc5b             | ENSDARP000000121836 |
| bcl2l1             | ENSDARP000000027919 |
| birc2              | ENSDARP000000103254 |
| bcl2               | ENSDARP000000105564 |
| bcl2b              | ENSDARP000000124838 |
| si:busm1-194e12.11 | ENSDARP000000072260 |
| si:zfos-2070c2.1   | ENSDARP000000072260 |
| si:zfos-2070c2.3   | ENSDARP000000097822 |
| txndc5             | ENSDARP000000116609 |
| dnase2             | ENSDARP000000120160 |
| agt                | ENSDARP000000017923 |
| stx17              | ENSDARP000000114720 |
| csnk1da            | ENSDARP000000003101 |
| bet1               | ENSDARP000000010900 |
| csnk1db            | ENSDARP000000014900 |
| sly1               | ENSDARP000000121390 |
| slmo2              | ENSDARP000000020101 |

**Supplementary Table. S4. Abbreviations of gene names used in PPI.**

|                  |                                                                                  |
|------------------|----------------------------------------------------------------------------------|
| neu1             | Neuraminidase 1                                                                  |
| galns            | Galactosamine (N-acetyl)-6-sulfate sulfatase                                     |
| ctsd             | Cathepsin D                                                                      |
| ctsz             | Cathepsin Z                                                                      |
| ctsba            | Cathepsin B, a                                                                   |
| glb1             | Galactosidase, beta 1                                                            |
| TPP2             | Tripeptidyl peptidase II                                                         |
| agtrap           | Angiotensin II receptor-associated protein                                       |
| NAPSA            | Napsin A aspartic peptidase                                                      |
| nots             | Nothepsin                                                                        |
| hspa5            | Heat shock protein 5                                                             |
| kif1a            | Kinesin family member 1Aa                                                        |
| elna             | Elastin a                                                                        |
| pebp1            | Phosphatidylethanolamine binding protein 1                                       |
| cd74a            | CD74 molecule                                                                    |
| TOLL8            | Toll-like receptor 8;                                                            |
| mhc2b            | Major histocompatibility complex class ii integral membrane beta chain precursor |
|                  |                                                                                  |
| mhc2bl           | H-2 class II histocompatibility antigen, E-S beta chain                          |
| zgc:153067       | Major histocompatibility complex class II DBB gene                               |
| si:zfos-2070c2.3 | Rano class ii histocompatibility antigen, a beta chain-like                      |
| mhc2dab          | Major histocompatibility complex class ii dab precursor                          |
| mhc2dcb          | Major histocompatibility complex class ii dcb precursor                          |
| mhc2d8.46a       | H-2 class II histocompatibility antigen                                          |
| bida             | BH3 interacting domain death agonist                                             |
| zgc:65811        | Tetraspanin                                                                      |
| ctsba            | Cathepsin B, a                                                                   |
| cst3             | Cystatin C                                                                       |
| mhc2a            | Novel vertebrate MHC class II alpha chain protein                                |
| zgc:153129       | tandem duplicate 1                                                               |
| zgc:66382        | tandem duplicate 1                                                               |
| psap             | Prosaposin                                                                       |
| zgc:162351       | Major histocompatibility complex class I ZEA                                     |
| bloc1s6          | Biogenesis of lysosome-related organelles complex 1 subunit 6                    |
| chchd7           | Coiled-coil-helix-coiled-coil-helix domain containing 7                          |
| ifi30            | Gamma-interferon-inducible lysosomal thiol reductase                             |
| prcp             | Prolylcarboxypeptidase (angiotensinase C)                                        |
| ctssb.1          | Cathepsin Sb, tandem duplicate 1                                                 |
| scpep1           | Serine carboxypeptidase 1                                                        |

|                    |                                                             |
|--------------------|-------------------------------------------------------------|
| letm1              | LETM1 and EF-hand domain-containing protein 1               |
| obs1a              | LETM1 and EF-hand domain-containing protein 1               |
| obs1a              | Obscurin-like protein 1a; Obscurin-like 1a                  |
| zfyve28            | Lateral signaling target protein 2 homolog                  |
| epx                | Eosinophil peroxidase                                       |
| TPO                | Thyroid peroxidase                                          |
| lamp1b             | Lysosome-associated membrane glycoprotein 1b precursor      |
| igf2r              | Cation-independent mannose-6-phosphate receptor precursor   |
| Lamp1              | Lysosomal-associated membrane protein 1                     |
| lamp2              | Lysosomal-associated membrane protein 2                     |
| esr1               | Estrogen receptor alpha                                     |
| cpvl               | Probable serine carboxypeptidase cpvl precursor             |
| sftpba             | Surfactant protein Ba                                       |
| cdh22              | Cadherin-22-like                                            |
| ZXDC               | ZXD family zinc finger C                                    |
| cobl               | Protein cordon-bleu                                         |
| IQSEC1             | IQ motif and Sec7 domain 1                                  |
| il12rb2            | Interleukin-12 receptor subunit beta-2                      |
| pdia4              | Protein disulfide-isomerase A4                              |
| mmp13b             | Matrix metalloproteinase 13b                                |
| mmp20a             | Matrix metalloproteinase 20a                                |
| ugt1b5             | UDP glucuronosyltransferase 1 family, polypeptide B5        |
| wfikkn1            | Kunitz and NTR domain-containing protein                    |
| ccr12.2            | Chemokine (c-c motif) receptor 12b, tandem duplicate 2      |
| fabp6              | Fatty acid binding protein 6                                |
| birc5a             | Baculoviral IAP repeat-containing 5a                        |
| birc5b             | Baculoviral IAP repeat-containing 5B                        |
| bcl2l1             | Bcl-xL-like protein 1                                       |
| birc2              | Baculoviral iap repeat-containing protein 2/3               |
| bcl2               | B-cell leukemia/lymphoma 2                                  |
| bcl2b              | B-cell CLL/lymphoma 2b                                      |
| si:busm1-194e12.11 | Novel protein similar to MHC class II alpha chain           |
| si:zfos-2070c2.1   | Uncharacterized protein loc368748 precursor                 |
| si:zfos-2070c2.3   | Rano class ii histocompatibility antigen, a beta chain-like |
| txndc5             | Thioredoxin domain containing 5                             |
| dnase2             | Deoxyribonuclease II                                        |
| agt                | Angiotensinogen                                             |
| stx17              | Syntaxin 17                                                 |
| csnk1da            | Casein kinase I isoform delta-A                             |
| bet1               | Blocked early in transport 1                                |
| csnk1db            | Casein kinase I isoform delta-B                             |

|       |                    |
|-------|--------------------|
| sly1  | Suppressor of ypt1 |
| slmo2 | Slowmo homolog 2   |
